# Supplementary material
Source: PubMed Central journal article supplement (PMC3700107)
Supplement: Supp_Table1.pdf [file Supp_Table1.pdf]

## Supplementary Data

SUPPLEMENTARY TABLE S1. PRIMER SEQUENCES USED FOR THE TRANSCRIPT DETECTION BY REVERSE TRANSCRIPTASE-QUANTITATIVE POLYMERASE CHAIN REACTION

| <i>Gene</i>          | <i>Sequence</i>                                                                                           |
|----------------------|-----------------------------------------------------------------------------------------------------------|
| <i>Oct4</i>          | Forward: 5' CACGAGTGGAAAGCAACTCA 3'<br>Reverse: 5' AGATGGTGGTCTGGCTGAAC 3'                                |
| <i>Sox2</i>          | Forward: 5' GTTACCTCTTCTCCCACTC 3'<br>Reverse: 5' CTCCAATTCCTTGTATCTC 3'                                  |
| <i>Klf4</i>          | Forward: 5' CAGGCTGTGGCAAAACCTAT 3'<br>Reverse: 5' AAGGCCCTGTCACACTTCTG 3'                                |
| <i>c-Myc</i>         | Forward: 5' AGTGCTGCATGAGGAGACAC 3'<br>Reverse: 5' GGTTTGCCTCTTCTCCACAG 3'                                |
| <i>Nanog</i>         | Forward: 5' AAGTACCTCAGCCTCCAGCA 3'<br>Reverse: 5' GTGCTGAGCCCTTCTGAATC 3'                                |
| <i>REX1</i>          | Forward: 5' TTCTTGCCAGTTCTGGAAGC 3'<br>Reverse: 5' TTCCCACTCTGCACACAC 3'                                  |
| <i>Eras</i>          | Forward: 5' CCCTGCTTGTCCATGAGATT 3'<br>Reverse: 5' TGGTAACTTGGTCCGAGAGG 3'                                |
| <i>Esrrb</i>         | Forward: 5' AACCATTCAAGGCAACATCG 3'<br>Reverse: 5' TTGAGGCATTTCATGAATCGG 3'                               |
| <i>Ecat1</i>         | Forward: 5' GCCCAAGTGGTTCATGTC 3'<br>Reverse: 5' CTCAACTCCAGCCTCCAGA 3'                                   |
| <i>Tbx3</i>          | Forward: 5' CCTTCCACTCCAACAACAC 3'<br>Reverse: 5' GCATGCTGTTCAAATTGAGG 3'                                 |
| <i>Fbx15</i>         | Forward: 5' GGCCTGAATGGAGAACTGA 3'<br>Reverse: 5' TCAAACCACCCTAGGTCTGC 3'                                 |
| <i>Dppa5</i>         | Forward: 5' CAGTCGCTGGTGTGAAATA 3'<br>Reverse: 5' TCCATTAGCCCGAATCTTG 3'                                  |
| <i>Dppa4</i>         | Forward: 5' AAAGGCCAGAAATTAGATGC 3'<br>Reverse: 5' ATTTCCAGAGGAACTGTCAC 3'                                |
| <i>Map3k8</i>        | Forward: 5' GAACAGAGATATACATGAGCCC 3'<br>Reverse: 5' TGTATAGGTAGGAGGGATAGG 3'                             |
| <i>Gdf3</i>          | Forward: 5' CGCAGGACTTATGCTACGTG 3'<br>Reverse: 5' CTGGGCCATGGTCAACTT 3'                                  |
| <i>Dnmt3l</i>        | Forward: 5' CCTGGTGAAGAACTGCCTTC 3'<br>Reverse: 5' GCAAAGTGAGCTGCACAGAG 3'                                |
| <i>Dppa3</i>         | Forward: 5' GCAGTCTACGGAACCGCATT 3'<br>Reverse: 5' TTGAACTTCCCTCCGGATTTT 3'                               |
| <i>Utf1</i>          | Forward: 5' GGCCATACCTTCGAATCCTC 3'<br>Reverse: 5' GGTTTGGTTCGAAGGAACCTC 3'                               |
| <i>Zic3</i>          | Forward: 5' AAGATTTTTGCCCGCTCTG 3'<br>Reverse: 5' TATAGGGCTTGTCCGAGGTG 3'                                 |
| <i>Brachury</i>      | Forward: 5' TCCCAGACCCAGTTCATAG 3'<br>Reverse: 5' TTCTTTGGCATCAAGGAAGG 3'                                 |
| <i>Mixl1</i>         | Forward: 5' CTACCCGAGTCCAGGATCCA 3'<br>Reverse: 5' ACTCCCCGCTTGAGGATAA 3'                                 |
| <i>Sox7</i>          | Forward: 5' TGTTGACAGATCCCCAAGAA 3'<br>Reverse: 5' CTGGGCACCAGTCAATTACA 3'                                |
| <i>Sox17</i>         | Forward: 5' CATGGATACAATGAGCAGCAC 3'<br>Reverse: 5' GCCTTTCACCTTACATCCC 3'                                |
| <i>Gata6</i>         | Forward: 5' CAACACAGTCCCCGTTCTTT 3'<br>Reverse: 5' TGGTACAGGCGTCAAGAGTG 3'                                |
| <i>Nestin</i>        | Forward: 5' AGGCTGAGAACTCTCGCTTG 3'<br>Reverse: 5' ATTAGGCAAGGGGAAGAGA 3'                                 |
| <i>Flk1</i>          | Forward: 5' AGCTCTCCGTGGATCTGAAA 3'<br>Reverse: 5' CCAAGAACTCCATGCCCTTA 3'                                |
| <i>Zic3 cloning</i>  | Forward: 5' CCCGGATCCCACCATGACGATGCTCCTGGACGGAGGC 3'<br>Reverse: 5' CCCCTCGAGGCATTTTGGTTGTCTCAGACGTACC 3' |
| <i>Gcn5 Cloning</i>  | Forward: 5' CCCGAATTCTATGGCGGAACCTTCCCAGGCC 3'<br>Reverse: 5' CCCGTCGACCTACTTGTCTGATGAGCCCTCC 3'          |
| <i>Myst4 Cloning</i> | Forward: 5' CCCGCGCGCCACCATGGTAAAACCTTGCAAACCCAC 3'<br>Reverse: 5' CCCGTCGACGGGCTGCCAGGCTGTCTACC 3'       |
| <i>pMX</i>           | Forward: 5' GATCCCAGTGTGGTGGTACG 3'<br>Reverse: 5' CTCGTGCTCCTGCGCCCTCAG 3'                               |
| <i>OCT4 Tg</i>       | Reverse: 5' CGAGTTGGAAAGGATAAAGTCTAG 3'                                                                   |
| <i>KLF4 Tg</i>       | Forward: 5' GCCTCGATCCTCCCTTTATC 3'                                                                       |
| <i>Zic3 Tg</i>       | Reverse: 5' ACTCCCAACCCAGGGAAC 3''                                                                        |
